# Supplementary material
Source: publisher figshare collection journal article supplement (https://future-science-group.figshare.com/ndownloader/files/29025366)
Supplement: Supplementary file 1 [file 29025366]

**Supplementary figures**


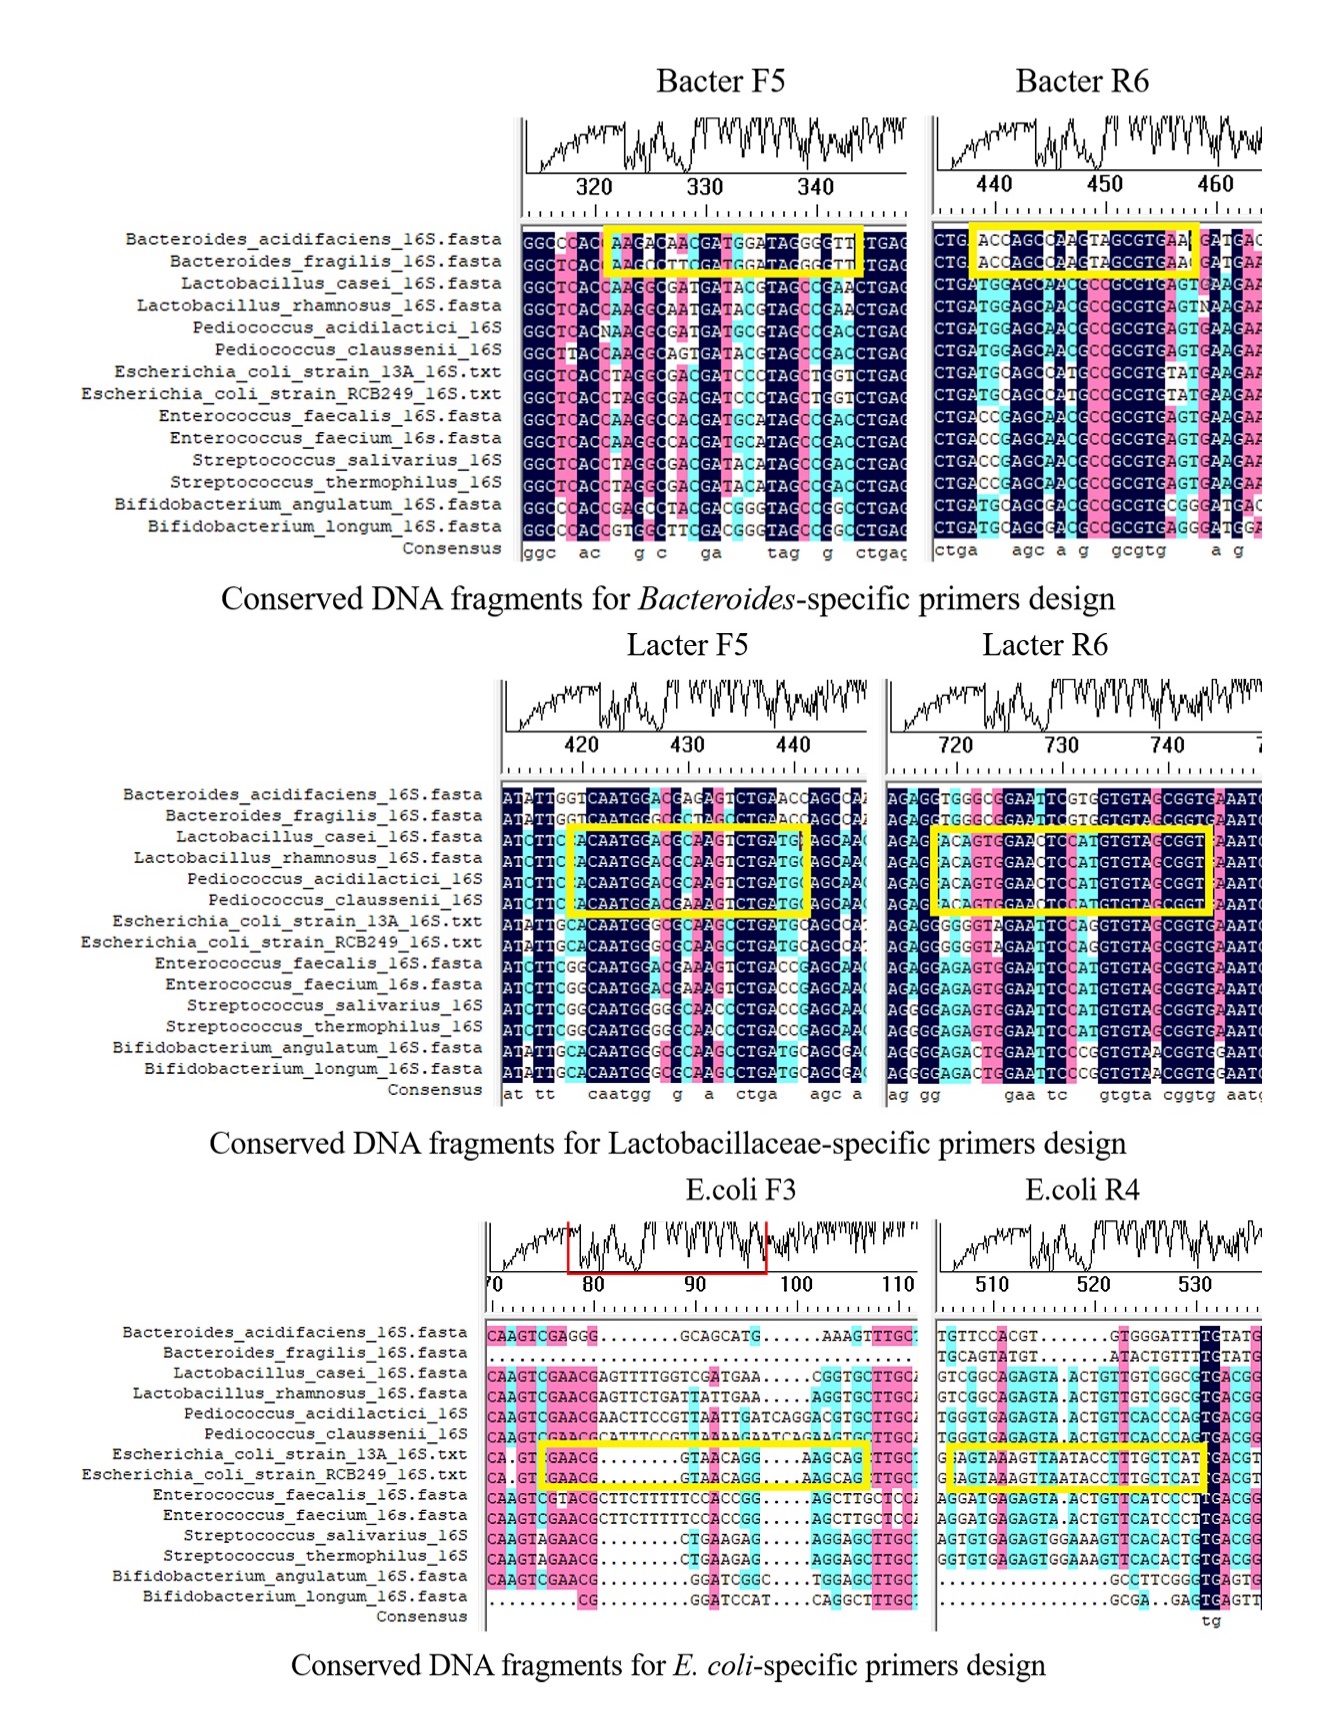


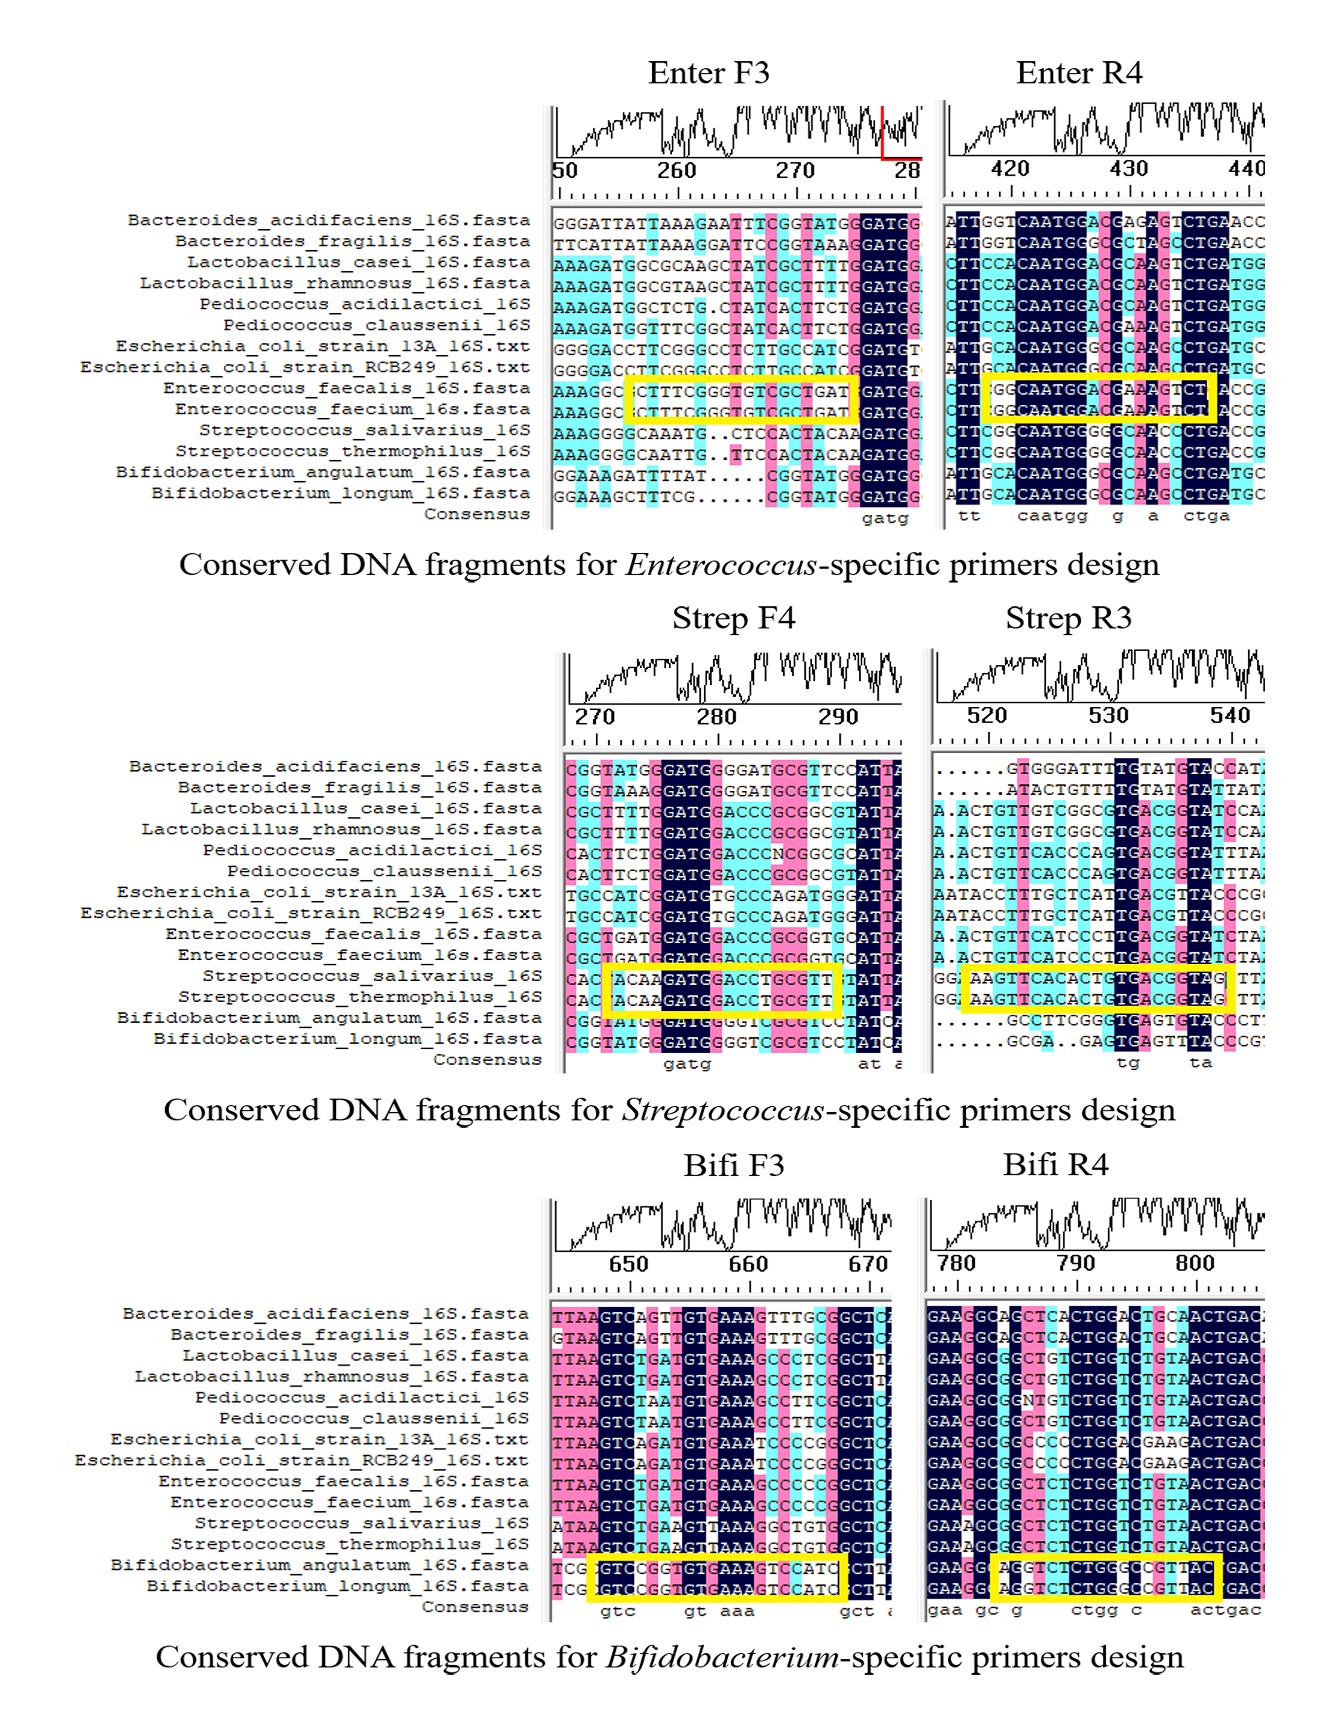


**Figure S1** Alignment of nucleotide sequences of 16S rRNA genes of six bacterial genera for specific primer pairs design. 16S rRNA gene sequences of *Bacteroides* (*Bacteroides acidfaciens* and *Bacteroides fragilis*), *Lactobacillaceae* (*Lactobacillus casei*, *Lactobacillus rhamnosus*, *Pediococcus acidilactici* and *Pediococcus claussenii*), *E. coli* (*E. coli* strain 13A and *E. coli* strain RCB249), *Enterococcus* (*Enterococcus faecalis* and *Enterococcus faecium*), *Streptococcus* (*Streptococcus salivarius* and *Streptococcus thermophilus*) and *Bifidobacterium* (*Bifidobacterium angulatum* and *Bifidobacterium longum*) were aligned with DNAMAN8.0. The yellow frames show the regions selected for primer design.


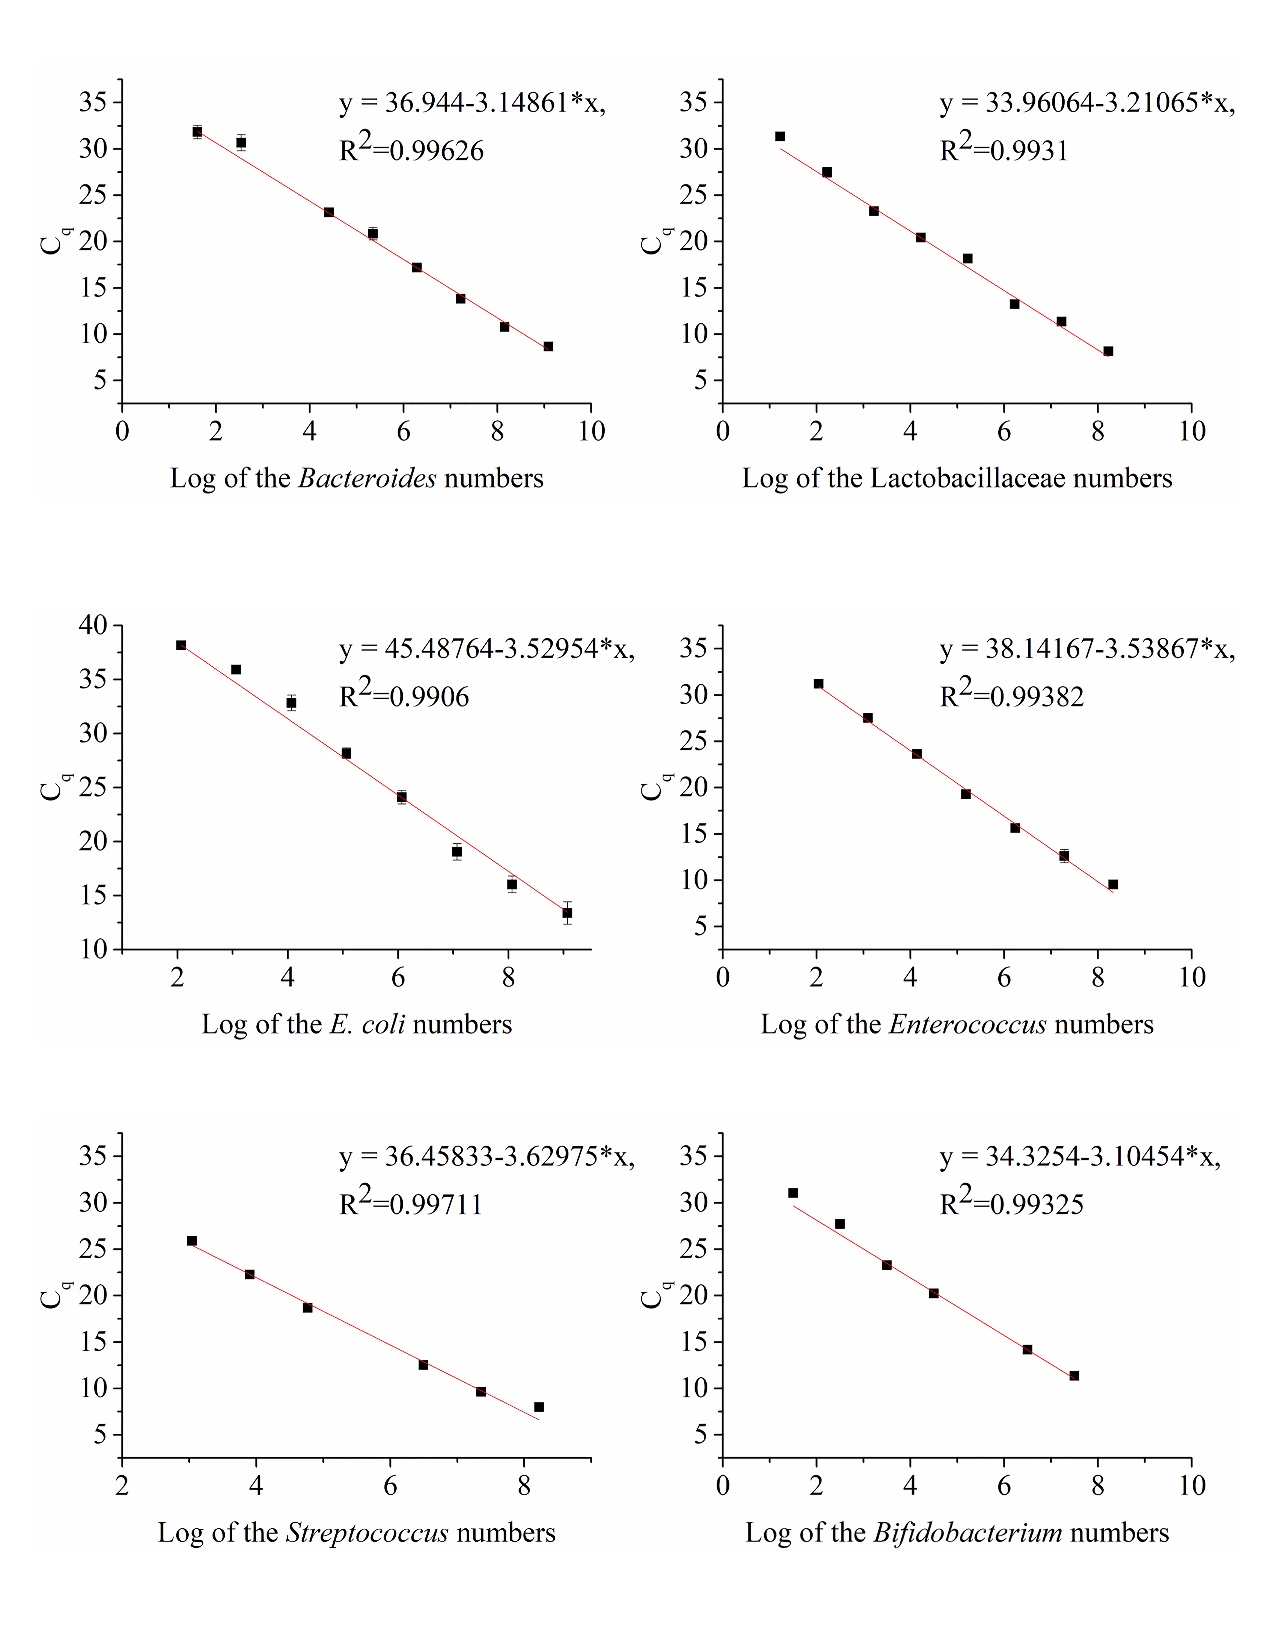


**Figure S2** The standard curves for six target bacteria genera. The number of target copies on a log-scaled X-axis were plotted against the Ct values on the Y-axis. Linear regression equations of the standard curves were shown in figures. Vertical bars represent the standard deviation of three technical replicates.
